# Supplementary material
Source: HighWire-hosted journal article supplement (https://bmjopen.bmj.com/content/12/1/e052324)
Supplement: inline-supplementary-material-3 [file inline-supplementary-material-3.pdf]

**Supplemental File 3: Full Search Strategy****Embase.com**

('dementia'/exp OR 'mild cognitive impairment'/de OR (dementia\* OR Alzheimer\* OR Mild-cognitive-impairment\*):ab,ti,kw) AND (((caregiv\* OR care-giv\* OR carer\* OR in-home-care\* OR care-provider\*) NEAR/3 (spous\* OR famil\* OR child\* OR parent\* OR informal\* OR program\* OR elder\*)) OR dementia\*-carer\*):ab,ti,kw) AND ('implementation science'/de OR (implement\* OR adopt\* OR uptake OR Appl\* OR Carry-out OR Perform\* OR Usage OR Practice OR Enactment OR Fulfil\* OR knowledge-transfer\* OR feasib\* OR adapt\* OR accept\* OR appropriate\* OR cost\* OR fidelit\* OR sustainab\* OR penetrat\* OR reach\* OR utili\* OR sustained-integration\* OR intention-to-chang\* OR embed\* OR normali\* OR Disseminat\* OR diffus\* OR (translat\* NEAR/3 knowledge\*) OR scale-up OR scaling OR barrier\* OR change-in-practice\* OR Obstruct\* OR Obstacle\* OR Facilitat\* OR Threat\* OR access\* OR retention OR retain\* OR compatib\* OR brakes OR levers OR (perception\* NEAR/3 attitude\*)):ab,ti,kw) AND ('intervention study'/de OR 'training'/de OR 'health program'/exp OR 'education'/de OR 'learning'/de OR (intervent\* OR training\* OR educat\* OR coach\* OR learn\* OR platform\* OR innovation\* OR program\* OR session\* OR technolog\* OR audit OR reminder\* OR ((web OR mobile\*) NEAR/3 (application\*)) OR trainer\* OR coach\* OR psychoeducation\* OR audit\* OR feedback\* OR psychotherap\* OR (occupation\* NEAR/3 therap\*) OR respite\* OR day-care\* OR evidence-based-practice\* OR (modif\* NEAR/3 environment\*) OR information-management-system\* OR consultation\* OR local-champion\* OR local-leader\* OR local-network\* OR organi\*ational-change\* OR cognit\*-behav\*-therap\*):ab,ti,kw) NOT ([conference abstract]/lim OR [editorial]/lim OR [letter]/lim OR [note]/lim OR [Review]/lim OR (review):ti) NOT (acetylcholinesterase\* OR donepezil\* OR huntington\* OR Parkinson):ti

**Medline (Ovid)**

(exp Dementia/ OR Cognitive Dysfunction/ OR (dementia\* OR Alzheimer\* OR Mild-cognitive-impairment\*).ab,ti,kf.) AND (((caregiv\* OR care-giv\* OR carer\* OR in-home-care\* OR care-provider\*) ADJ3 (spous\* OR famil\* OR child\* OR parent\* OR informal\* OR program\* OR elder\*)) OR dementia\*-carer\*).ab,ti,kf.) AND (Implementation Science/ OR (implement\* OR adopt\* OR uptake OR Appl\* OR Carry-out OR Perform\* OR Usage

OR Practice OR Enactment OR Fulfil\* OR knowledge-transfer\* OR feasib\* OR adapt\* OR accept\* OR appropriate\* OR cost\* OR fidelit\* OR sustainab\* OR penetrat\* OR reach\* OR utili\* OR sustained-integration\* OR intention-to-chang\* OR embed\* OR normali\* OR Disseminat\* OR diffus\* OR (translat\* ADJ3 knowledge\*) OR scale-up OR scaling OR barrier\* OR change-in-practice\* OR Obstruct\* OR Obstacle\* OR Facilitat\* OR Threat\* OR access\* OR retention OR retain\* OR compatib\* OR brakes OR levers OR (perception\* ADJ3 attitude\*).ab,ti,kf.) AND (Education/ OR education.fx. OR Learning/ OR (intervent\* OR training\* OR educat\* OR coach\* OR learn\* OR platform\* OR innovation\* OR program\* OR session\* OR technolog\* OR audit OR reminder\* OR ((web OR mobile\*) ADJ3 (application\*)) OR trainer\* OR coach\* OR psychoeducation\* OR audit\* OR feedback\* OR psychotherap\* OR (occupation\* ADJ3 therap\*) OR respite\* OR day-care\* OR evidence-based-practice\* OR (modif\* ADJ3 environment\*) OR information-management-system\* OR consultation\* OR local-champion\* OR local-leader\* OR local-network\* OR organi\*ational-change\* OR cognit\*-behav\*-therap\*).ab,ti,kf.) NOT (letter\* OR news OR comment\* OR editorial\* OR congres\* OR abstract\* OR book\* OR chapter\* OR dissertation abstract\*).pt. NOT (review).ti. NOT (acetylcholinesterase\* OR donepezil\* OR huntington\* OR Parkinson).ti.

### Web of Science

(TI=(dementia\* OR Alzheimer\* OR Mild-cognitive-impairment\*) OR AB=(dementia\* OR Alzheimer\* OR Mild-cognitive-impairment\*)) AND (TI=(((caregiv\* OR care-giv\* OR carer\* OR in-home-care\* OR care-provider\*) NEAR/2 (spous\* OR famil\* OR child\* OR parent\* OR informal\* OR program\* OR elder\*)) OR dementia\*-carer\*) OR AB=(((caregiv\* OR care-giv\* OR carer\* OR in-home-care\* OR care-provider\*) NEAR/2 (spous\* OR famil\* OR child\* OR parent\* OR informal\* OR program\* OR elder\*)) OR dementia\*-carer\*)) AND (TI=(implement\* OR adopt\* OR uptake OR Appl\* OR Carry-out OR Perform\* OR Usage OR Practice OR Enactment OR Fulfil\* OR knowledge-transfer\* OR feasib\* OR adapt\* OR accept\* OR appropriate\* OR cost\* OR fidelit\* OR sustainab\* OR penetrat\* OR reach\* OR utili\* OR sustained-integration\* OR intention-to-chang\* OR embed\* OR normali\* OR Disseminat\* OR diffus\* OR (translat\* NEAR/2 knowledge\*) OR scale-up OR scaling OR barrier\* OR change-in-practice\* OR Obstruct\* OR Obstacle\* OR Facilitat\* OR Threat\* OR access\* OR retention OR retain\* OR compatib\* OR brakes OR levers OR (perception\* NEAR/2 attitude\*)) OR AB=(implement\* OR adopt\* OR

uptake OR Appl\* OR Carry-out OR Perform\* OR Usage OR Practice OR Enactment OR Fulfil\* OR knowledge-transfer\* OR feasib\* OR adapt\* OR accept\* OR appropriate\* OR cost\* OR fidelit\* OR sustainab\* OR penetrat\* OR reach\* OR utili\* OR sustained-integration\* OR intention-to-chang\* OR embed\* OR normali\* OR Disseminat\* OR diffus\* OR (translat\* NEAR/2 knowledge\*) OR scale-up OR scaling OR barrier\* OR change-in-practice\* OR Obstruct\* OR Obstacle\* OR Facilitat\* OR Threat\* OR access\* OR retention OR retain\* OR compatib\* OR brakes OR levers OR (perception\* NEAR/2 attitude\*)) AND (TI=(intervent\* OR training\* OR educat\* OR coach\* OR learn\* OR platform\* OR innovation\* OR program\* OR session\* OR technolog\* OR audit OR reminder\* OR ((web OR mobile\*) NEAR/2 (application\*)) OR trainer\* OR coach\* OR psychoeducation\* OR audit\* OR feedback\* OR psychotherap\* OR (occupation\* NEAR/2 therap\*) OR respite\* OR day-care\* OR evidence-based-practice\* OR (modif\* NEAR/2 environment\*) OR information-management-system\* OR consultation\* OR local-champion\* OR local-leader\* OR local-network\* OR organi\*ational-change\* OR cognit\*-behav\*-therap\*) OR AB=(intervent\* OR training\* OR educat\* OR coach\* OR learn\* OR platform\* OR innovation\* OR program\* OR session\* OR technolog\* OR audit OR reminder\* OR ((web OR mobile\*) NEAR/2 (application\*)) OR trainer\* OR coach\* OR psychoeducation\* OR audit\* OR feedback\* OR psychotherap\* OR (occupation\* NEAR/2 therap\*) OR respite\* OR day-care\* OR evidence-based-practice\* OR (modif\* NEAR/2 environment\*) OR information-management-system\* OR consultation\* OR local-champion\* OR local-leader\* OR local-network\* OR organi\*ational-change\* OR cognit\*-behav\*-therap\*)) AND DT=Article NOT TI=(acetylcholinesterase\* OR donepezil\* OR huntington\* OR Parkinson)

### **Cochrane Central**

((dementia\* OR Alzheimer\* OR Mild NEXT cognitive NEXT impairment\*):ab,ti,kw) AND (((caregiv\* OR care NEXT giv\* OR carer\* OR in NEXT home NEXT care\* OR care NEXT provider\*) NEAR/3 (spous\* OR famil\* OR child\* OR parent\* OR informal\* OR program\* OR elder\*)) OR dementia\* NEXT carer\*):ab,ti,kw) AND ((implement\* OR adopt\* OR uptake OR Appl\* OR Carry NEXT out OR Perform\* OR Usage OR Practice OR Enactment OR Fulfil\* OR knowledge NEXT transfer\* OR feasib\* OR adapt\* OR accept\* OR appropriate\* OR cost\* OR fidelit\* OR sustainab\* OR penetrat\* OR reach\* OR utili\* OR sustained NEXT integration\* OR intention NEXT to NEXT chang\* OR

embed\* OR normali\* OR Disseminat\* OR diffus\* OR (translat\* NEAR/3 knowledge\*)  
OR scale NEXT up OR scaling OR barrier\* OR change NEXT in NEXT practice\* OR  
Obstruct\* OR Obstacle\* OR Facilitat\* OR Threat\* OR access\* OR retention OR retain\*  
OR compatib\* OR brakes OR levers OR (perception\* NEAR/3 attitude\*):ab,ti,kw) **AND**  
((intervent\* OR training\* OR educat\* OR coach\* OR learn\* OR platform\* OR  
innovation\* OR program\* OR session\* OR technolog\* OR audit OR reminder\* OR ((web  
OR mobile\*) NEAR/3 (application\*)) OR trainer\* OR coach\* OR psychoeducation\* OR  
audit\* OR feedback\* OR psychotherap\* OR (occupation\* NEAR/3 therap\*) OR respite\*  
OR day NEXT care\* OR evidence NEXT based NEXT practice\* OR (modif\* NEAR/3  
environment\*) OR information NEXT management NEXT system\* OR consultation\* OR  
local NEXT champion\* OR local NEXT leader\* OR local NEXT network\* OR  
organi\*ational NEXT change\* OR cognit\* NEXT behav\* NEXT therap\*):ab,ti,kw) *NOT*  
(acetylcholinesterase\* OR donepezil\* OR huntington\* OR Parkinson):ti
